# Supplementary material for: An Efficient Synthesis of Phenols via Oxidative Hydroxylation of Arylboronic Acids Using (NH4)2S2O8
Source: Hindawi journal article supplement (doi:10.1155/2014/569572), 2014-01-01
Supplement: f1 [file 569572.f1.pdf]

## Supporting Information

**An efficient synthesis of phenols via oxidative hydroxylation of arylboronic acids  
using  $(\text{NH}_4)_2\text{S}_2\text{O}_8$**

**Claudia A. Contreras-Celedón\*, Luis Chacón-García, and Nancy Judith Lira Corral**

Laboratorio de Diseño Molecular, Instituto de Investigaciones Químico Biológicas,  
Universidad Michoacana de San Nicolás de Hidalgo. Edificio B-1, Ciudad Universitaria,  
Morelia, Michoacán, México. CP 58033

\*Author to whom correspondence should be addressed; E-Mail:

[celedon@umich.mx](mailto:celedon@umich.mx) ;

Tel.: +52 443 326 5790; Fax: +52 443 326 5788.

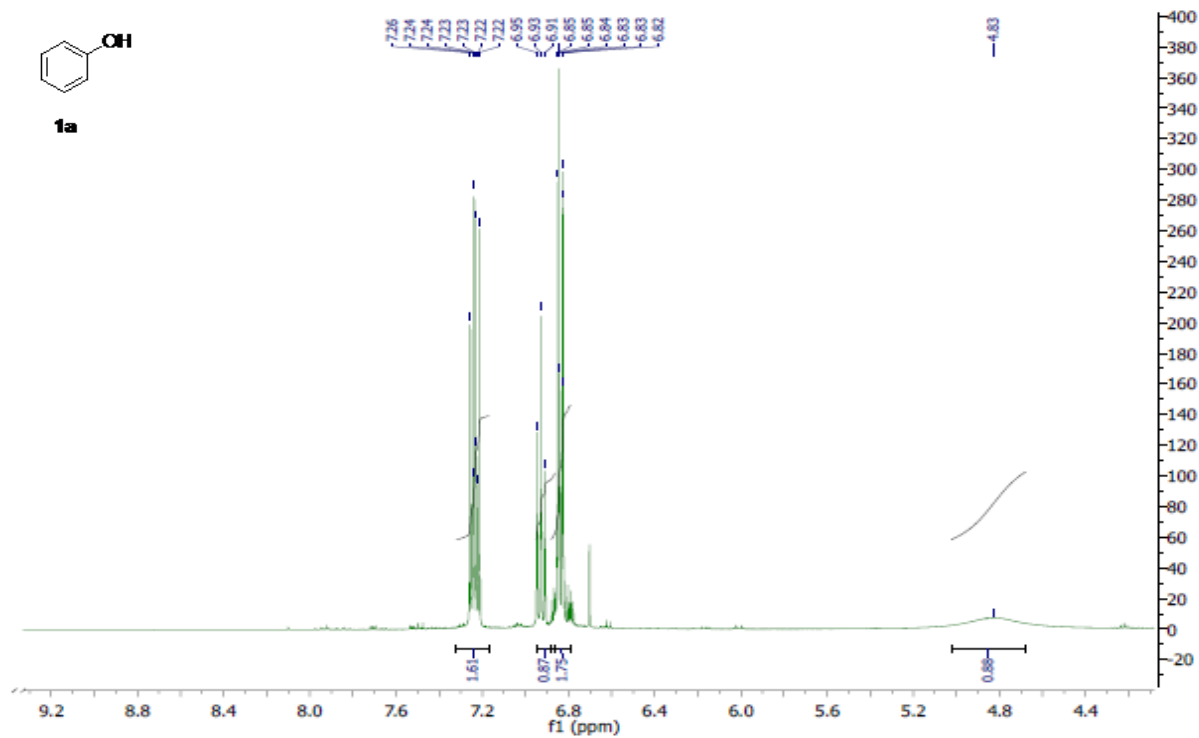

Spectra RMN-<sup>1</sup>H (CDCl<sub>3</sub>, 400 MHz) of phenol **1a**

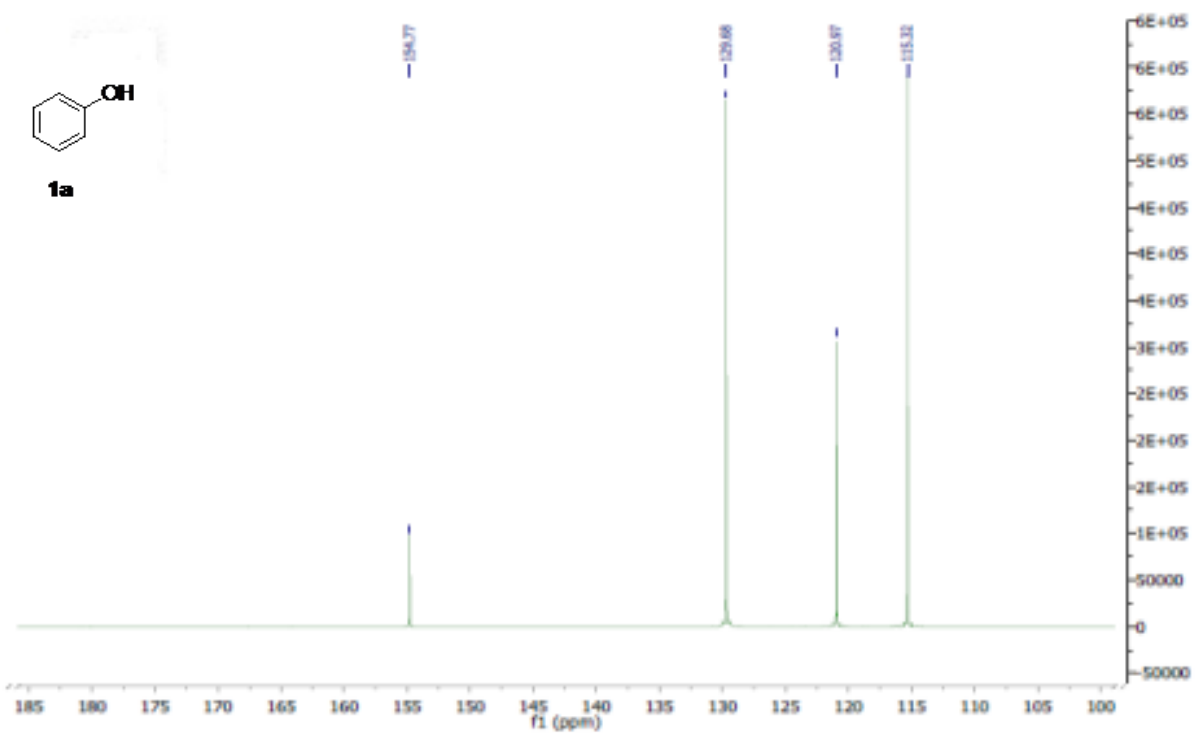

Spectra RMN-<sup>13</sup>C(CDCl<sub>3</sub>, 100 MHz) of phenol **1a**

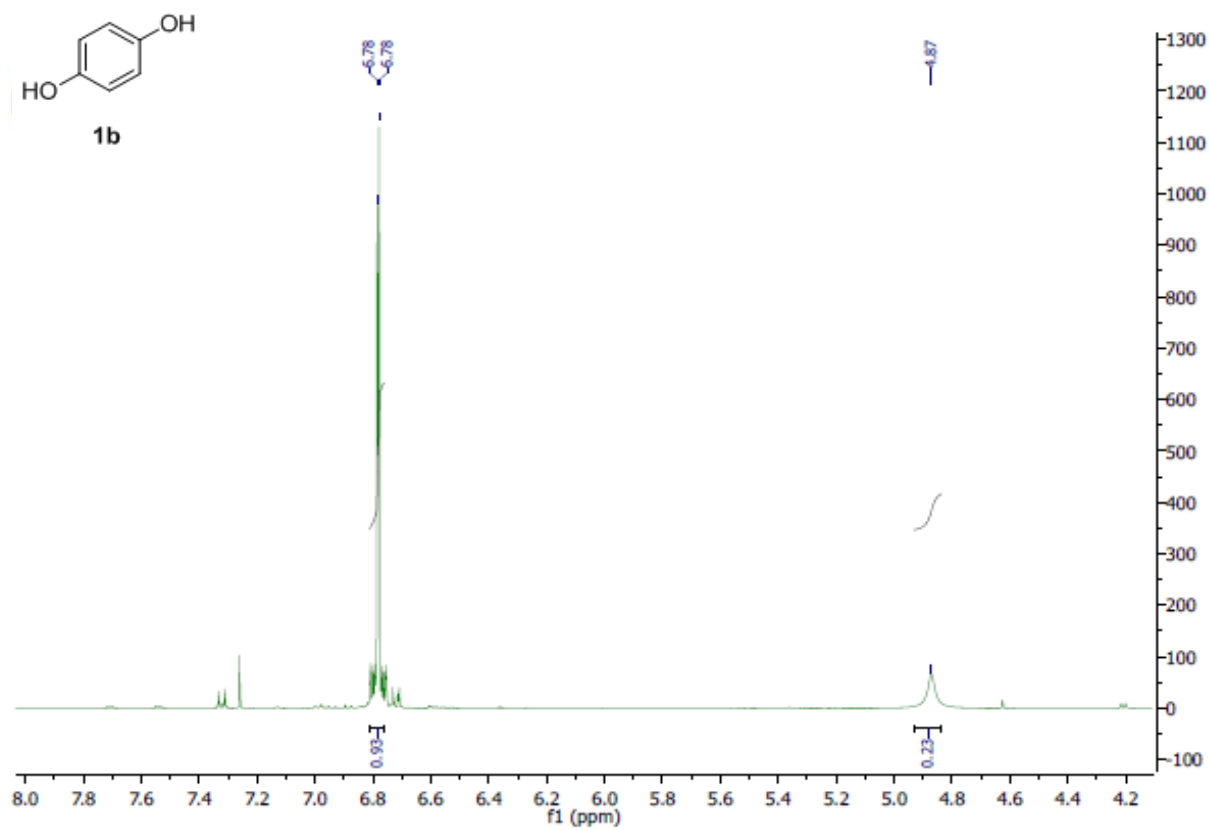

Spectra RMN-<sup>1</sup>H (CDCl<sub>3</sub>, 400 MHz) of *p*-Hydroxyphenol **1b**

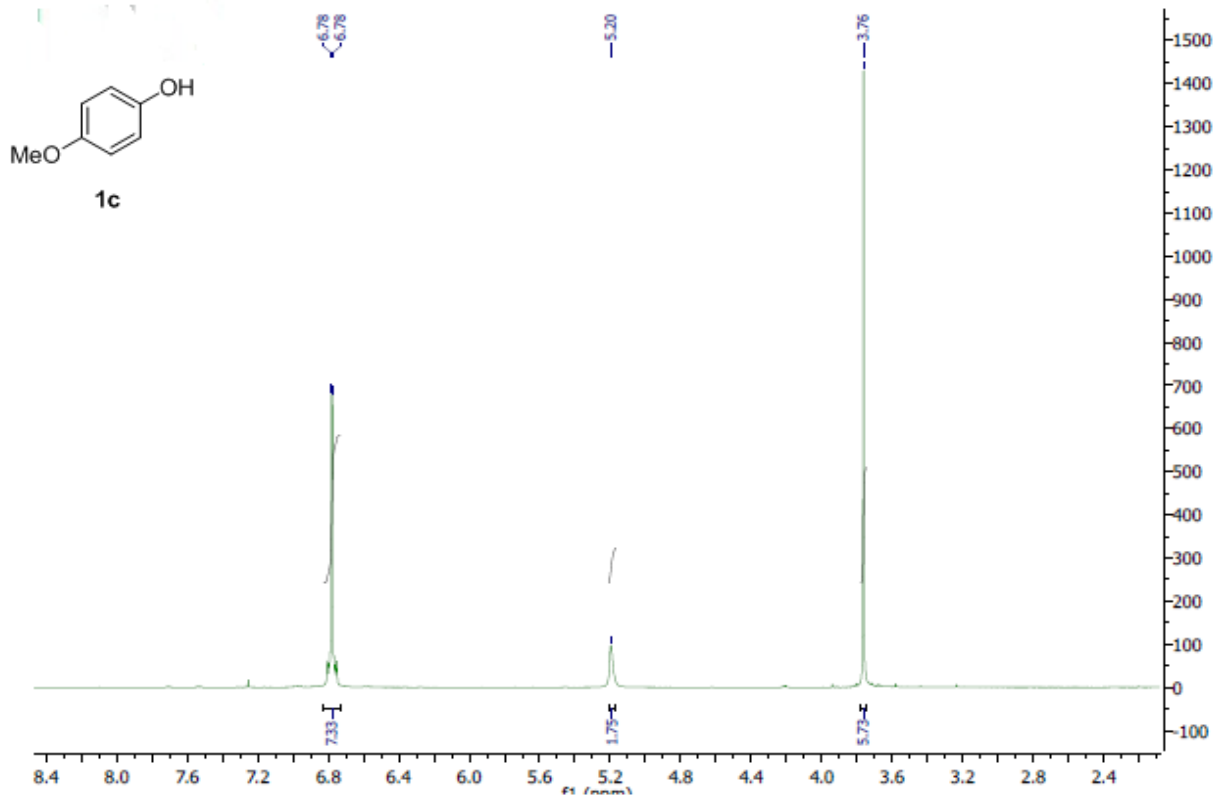

Spectra RMN- $^1\text{H}$  ( $\text{CDCl}_3$ , 400 MHz) of *p*-Methoxyphenol **1c**

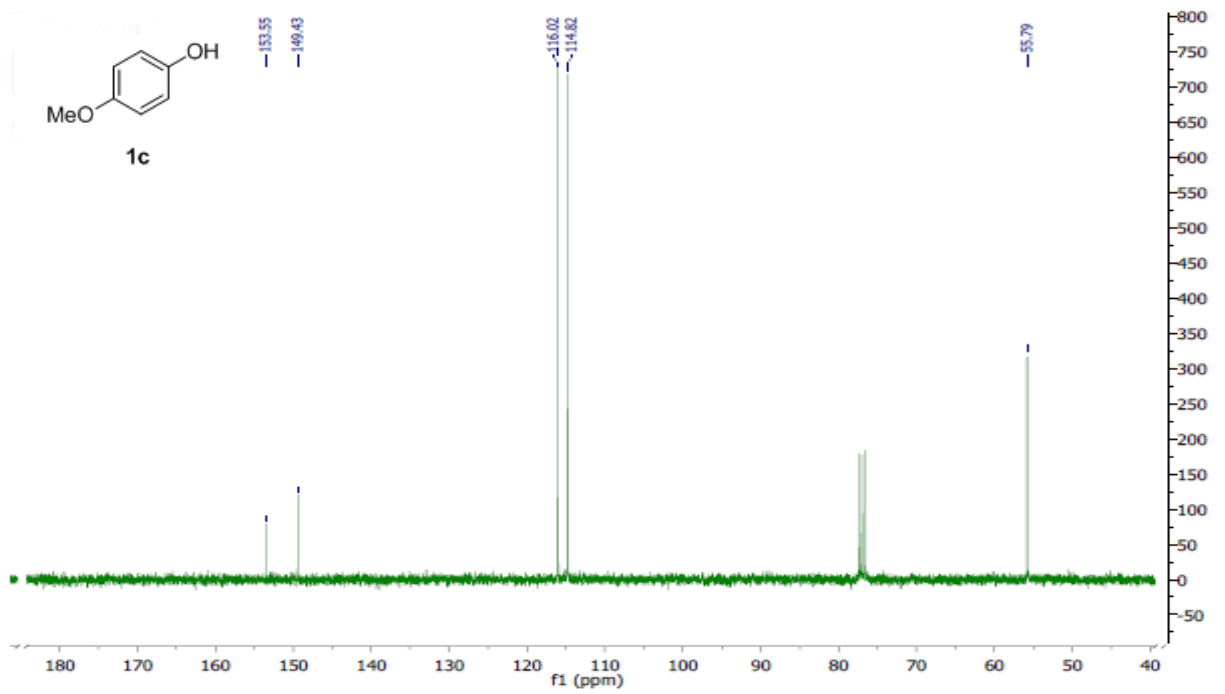

Spectra RMN- $^{13}\text{C}$  ( $\text{CDCl}_3$ , 100 MHz) of *p*-Methoxyphenol **1c**

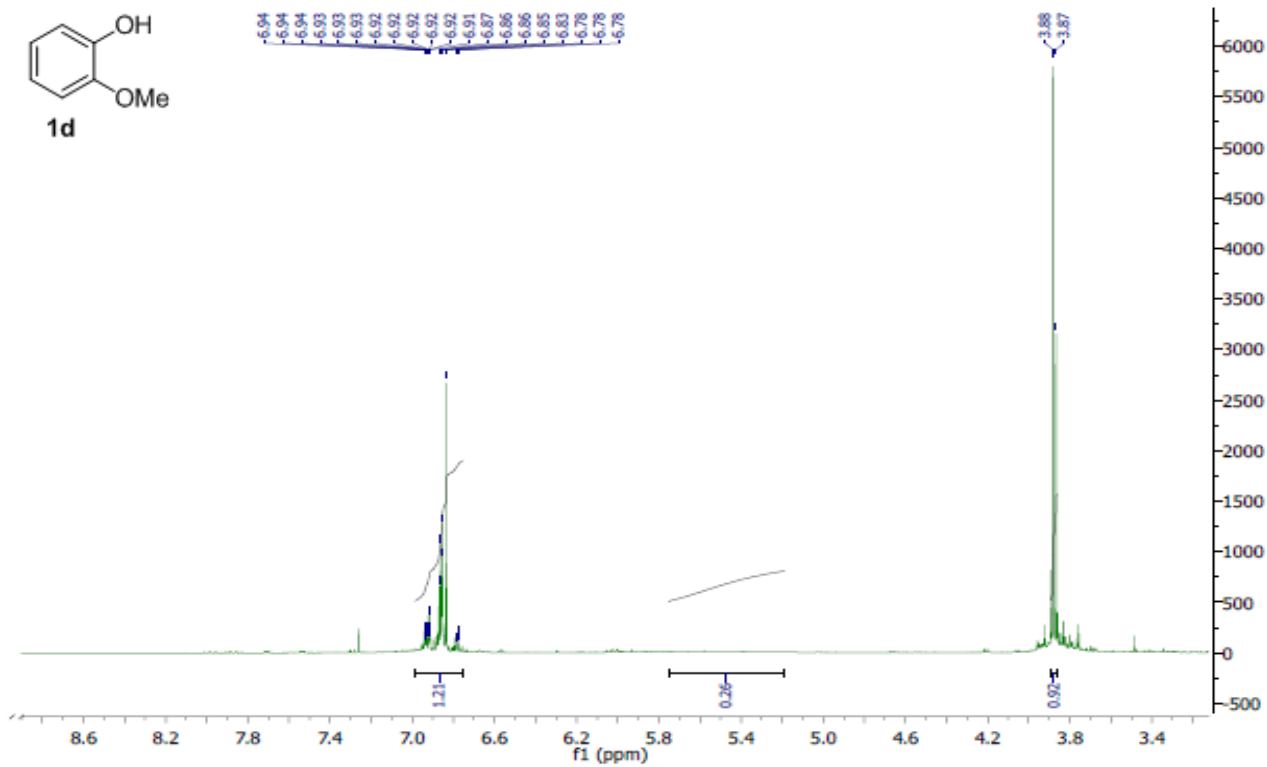

Spectra RMN-<sup>1</sup>H (CDCl<sub>3</sub>, 400 MHz) of o-Methoxyphenol **1d**

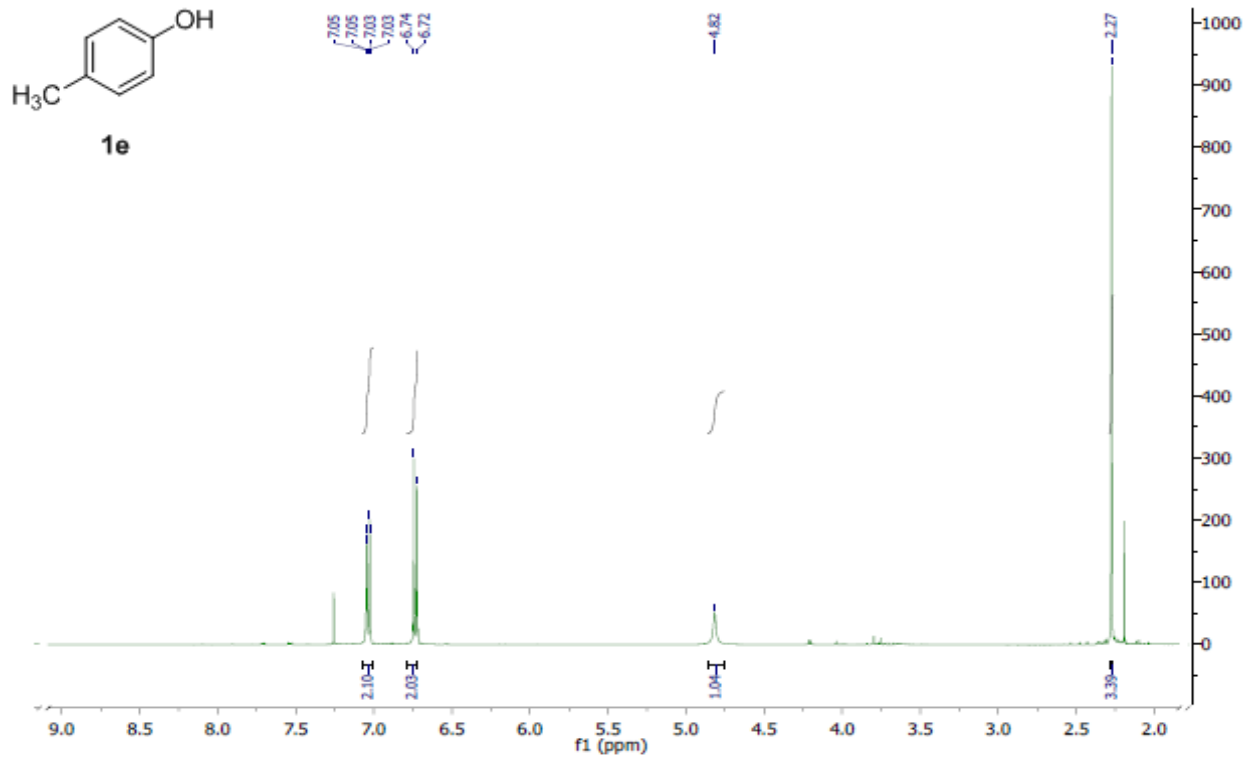

Spectra RMN-<sup>1</sup>H (CDCl<sub>3</sub>, 400 MHz) of *p*-Methylphenol **1e**

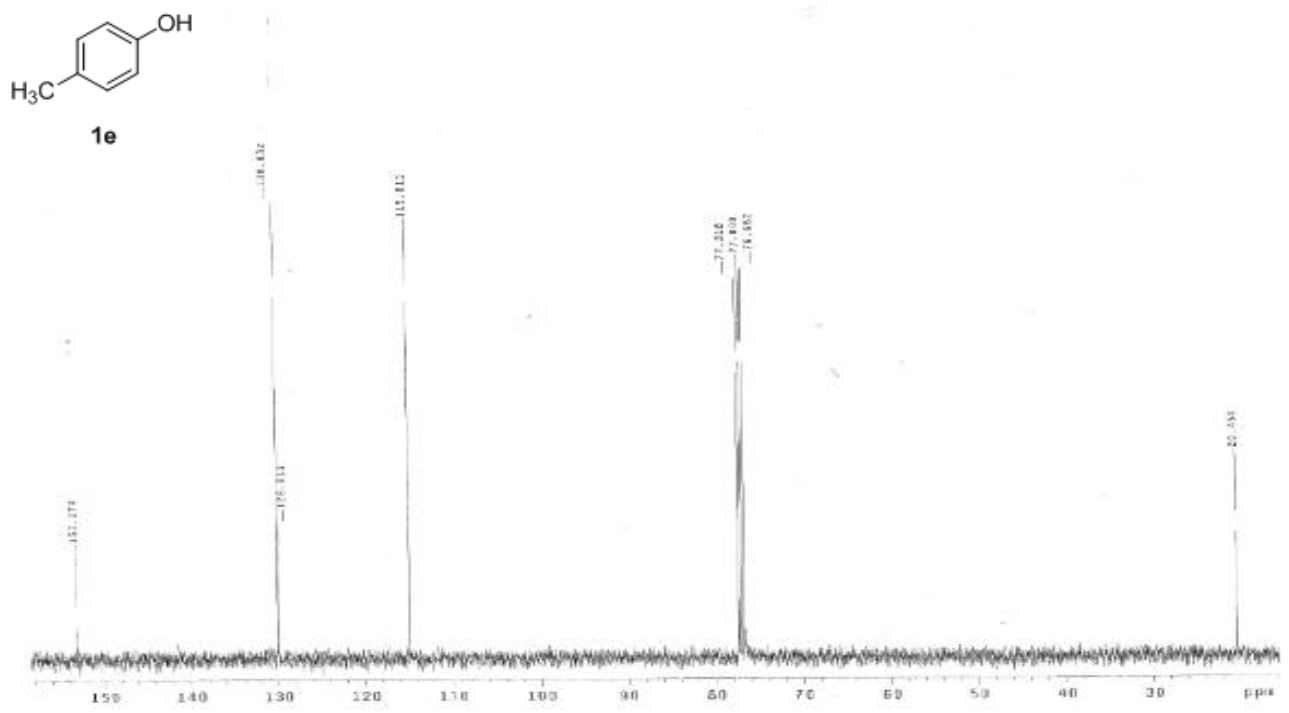

Spectra RMN-<sup>13</sup>C(CDCl<sub>3</sub>, 100 MHz) de *p*-Methylphenol **1e**

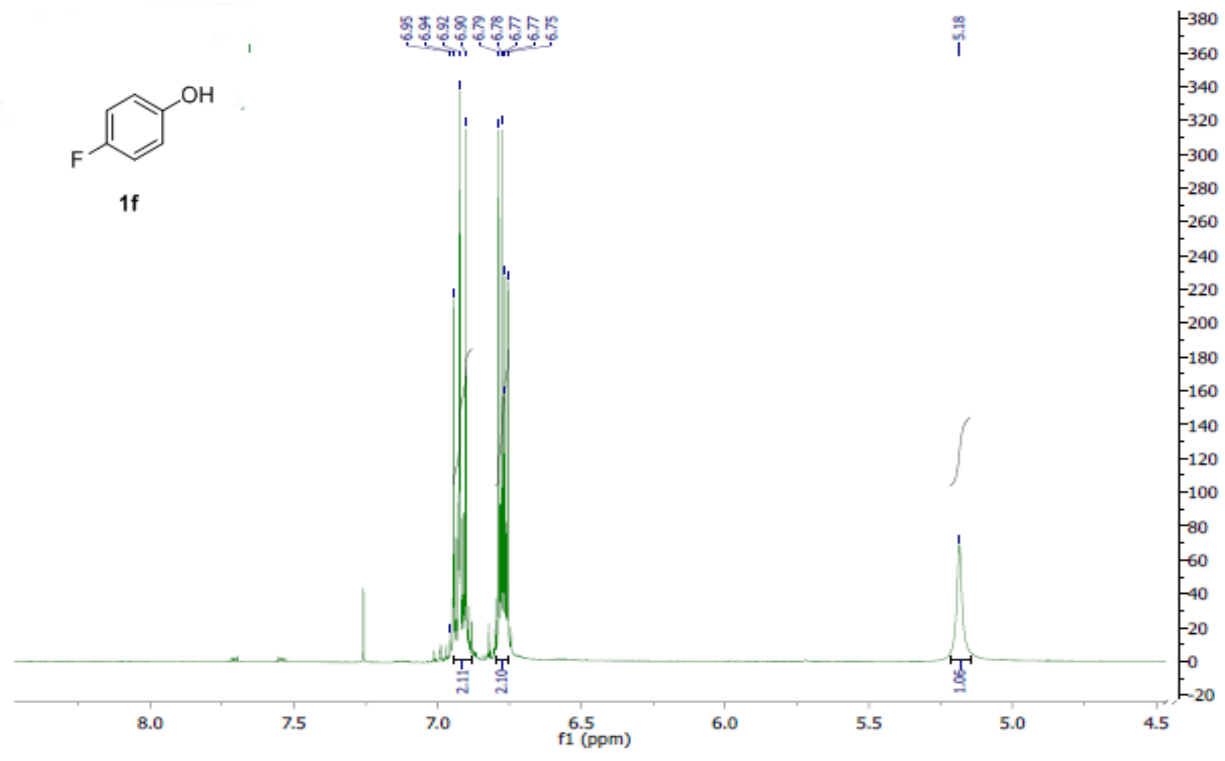

Spectra RMN-<sup>1</sup>H (CDCl<sub>3</sub>, 400 MHz) of *p*-Fluorophenol **1f**

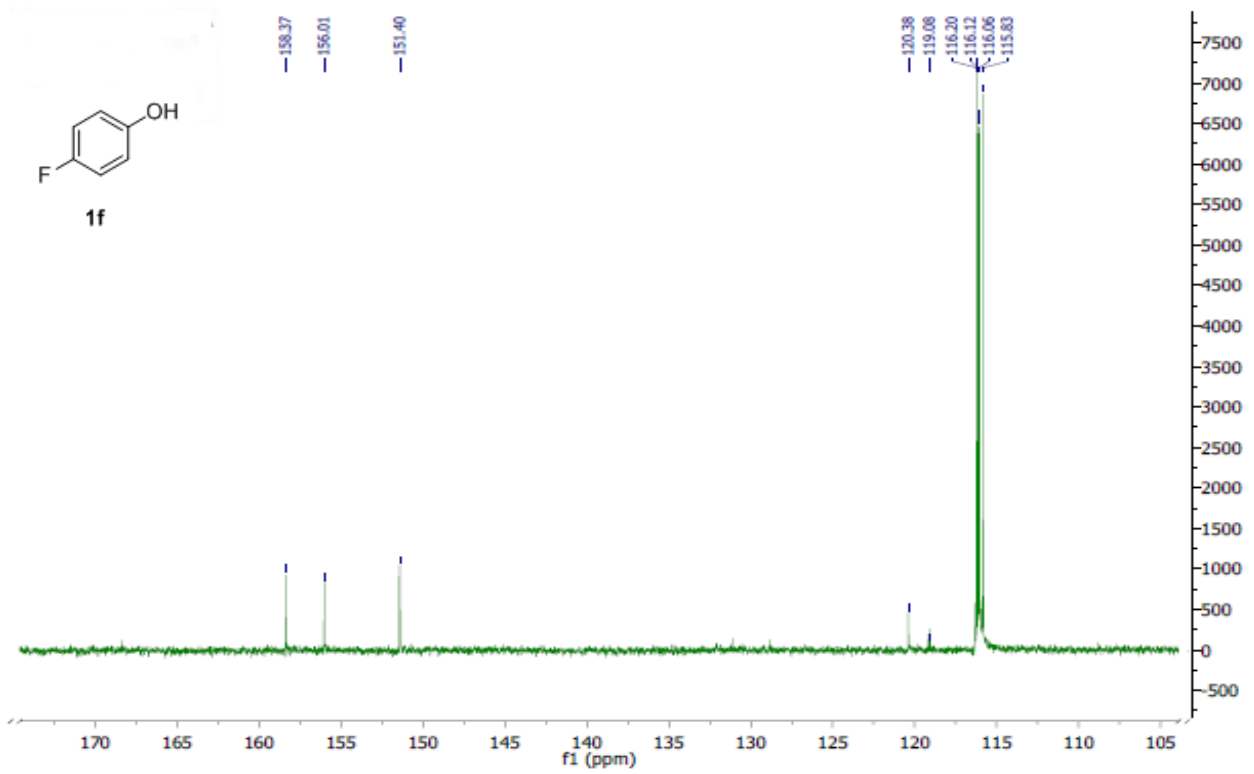

Spectra RMN-<sup>13</sup>C(CDCl<sub>3</sub>, 100 MHz) de *p*-Fluorophenol **1f**

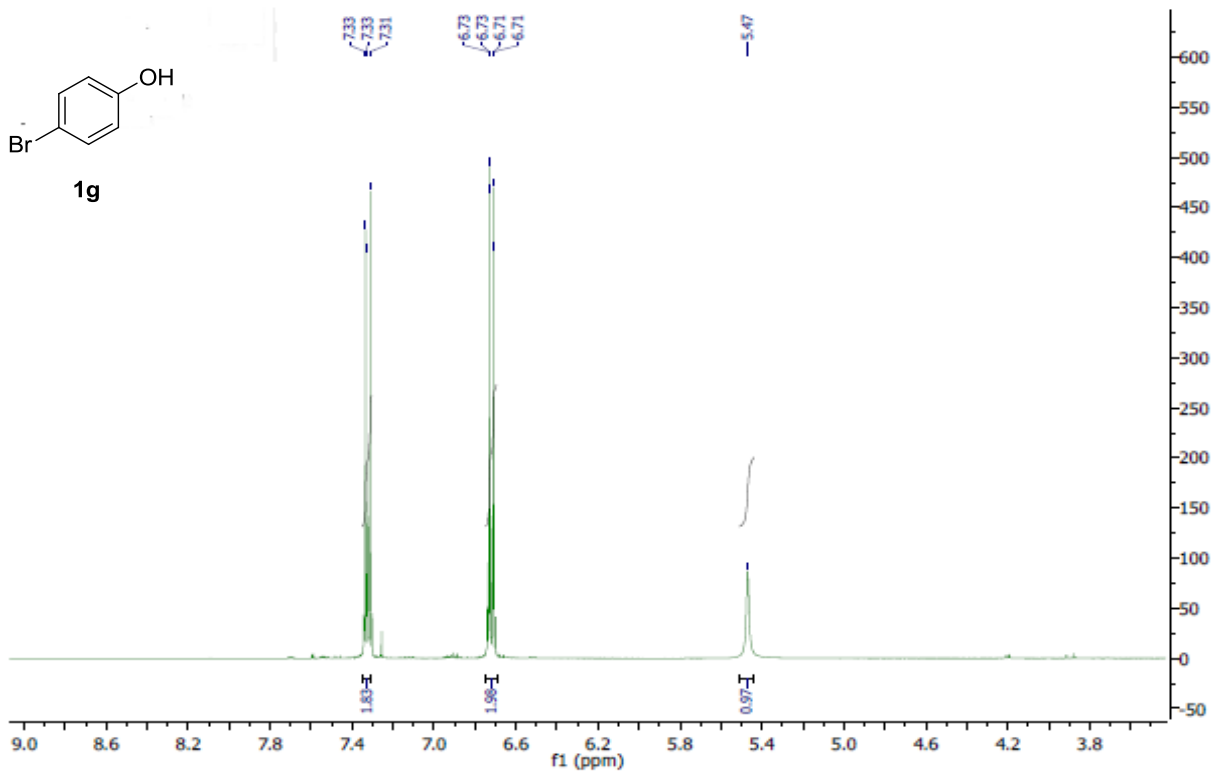

Spectra RMN- $^1\text{H}$  ( $\text{CDCl}_3$ , 400 MHz) of *p*-Bromophenol **1g**

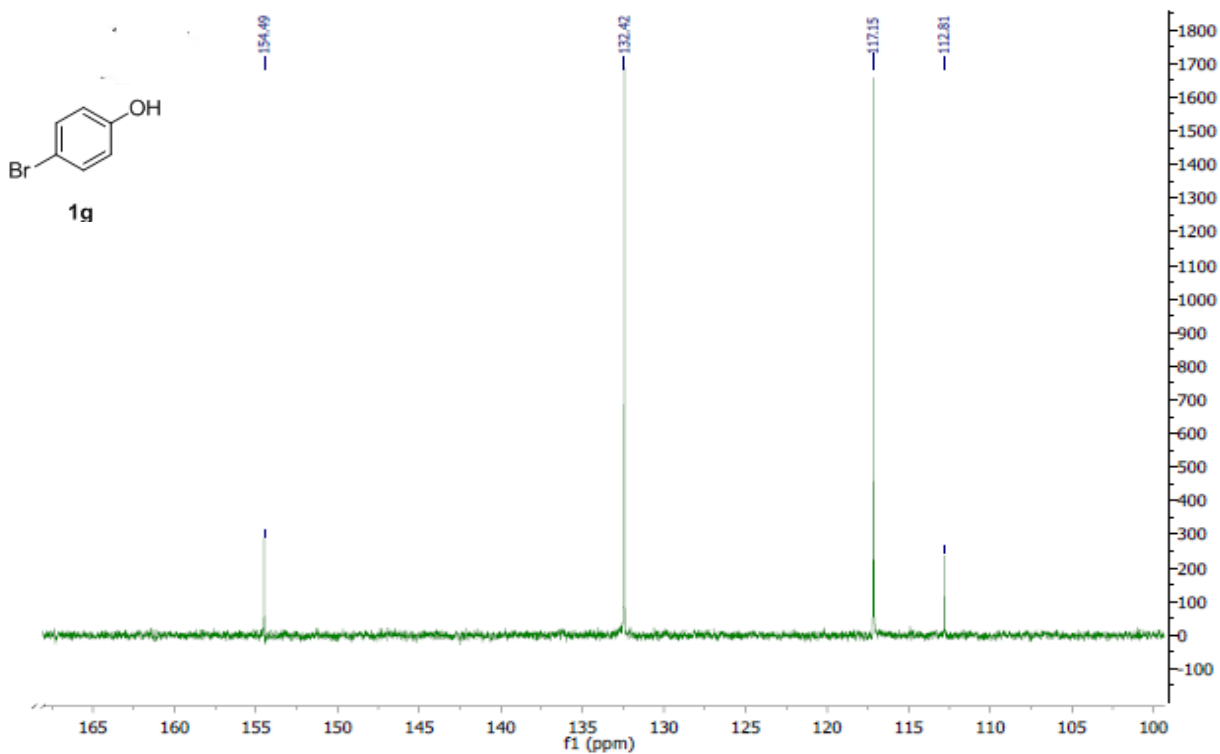

Spectra RMN- $^{13}\text{C}$  ( $\text{CDCl}_3$ , 100 MHz) de *p*-Bromophenol **1g**



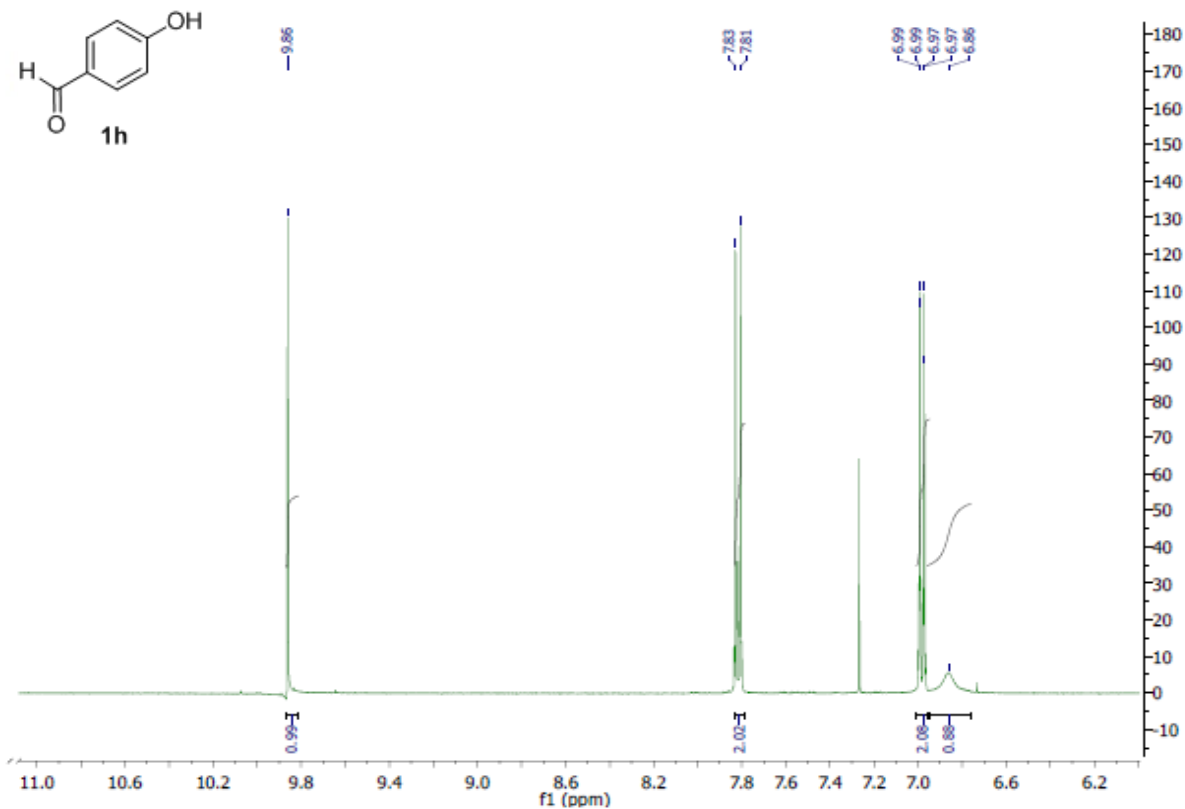

Spectra RMN-<sup>13</sup>C(CDCl<sub>3</sub> , 100 MHz) de *p*-Hydroxybenzaldehyde **1h**

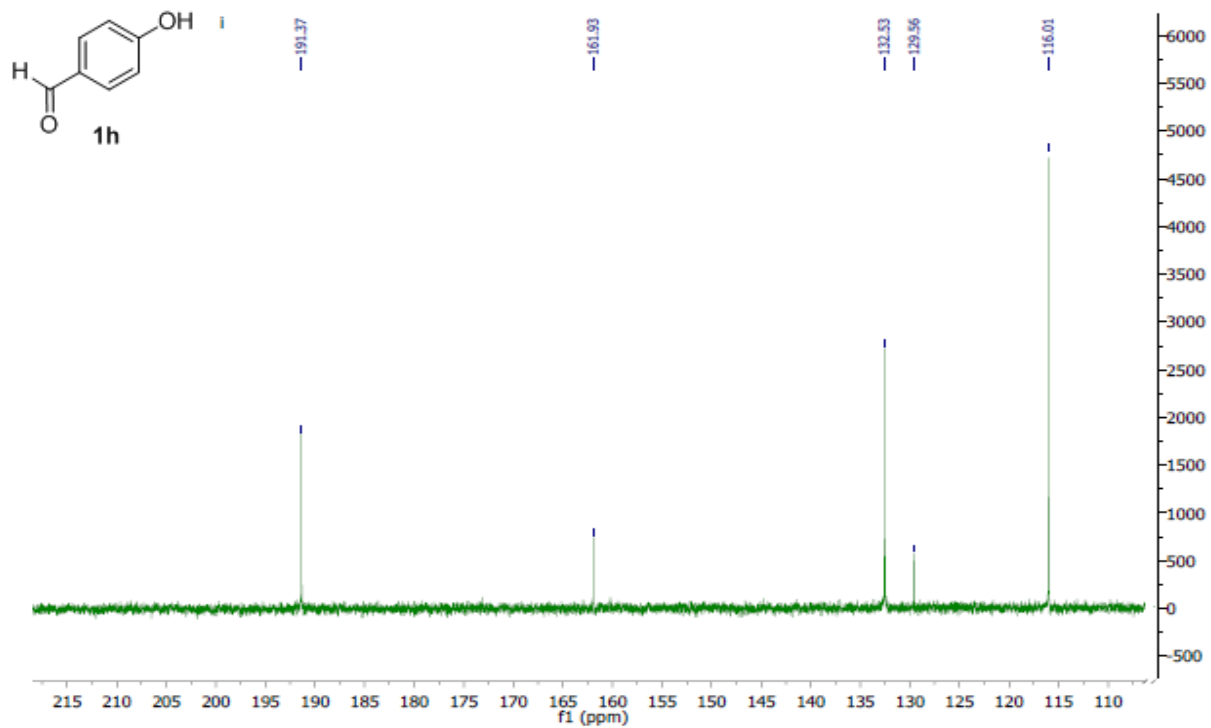

Spectra RMN-<sup>13</sup>C(CDCl<sub>3</sub> , 100 MHz) de *p*-Hydroxybenzaldehyde **1h**

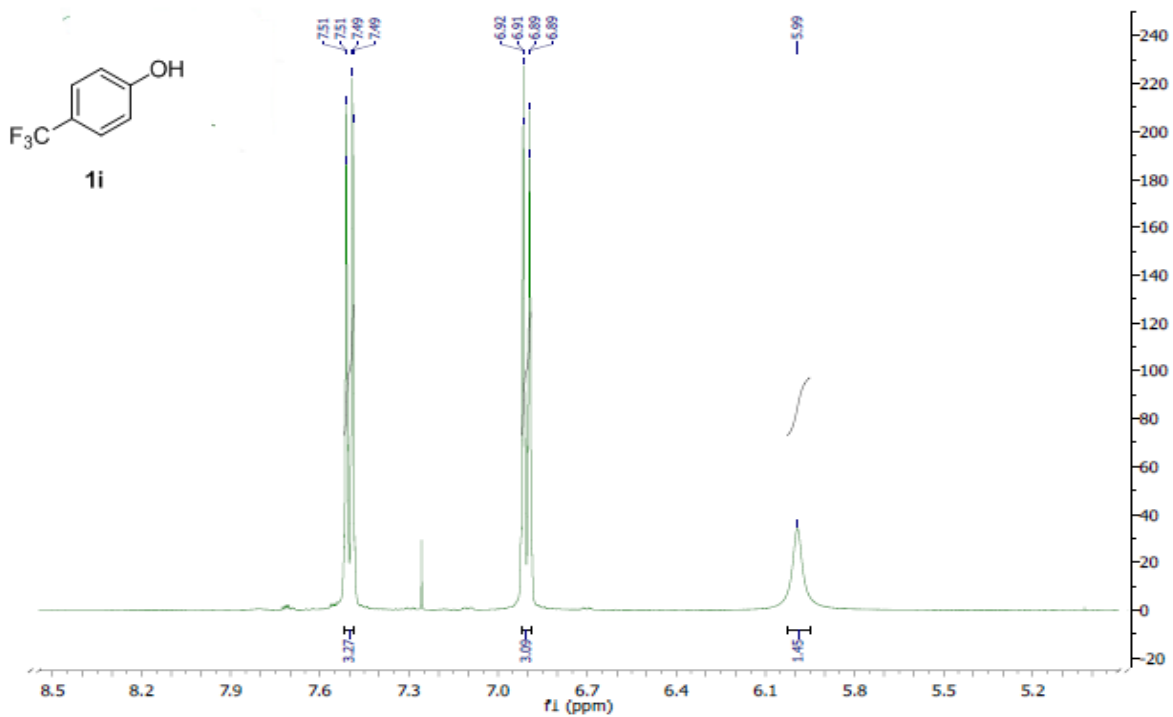

Spectra RMN- $^1\text{H}$  ( $\text{CDCl}_3$ , 400 MHz) of *p*-Trifluoromethylphenol **1i**

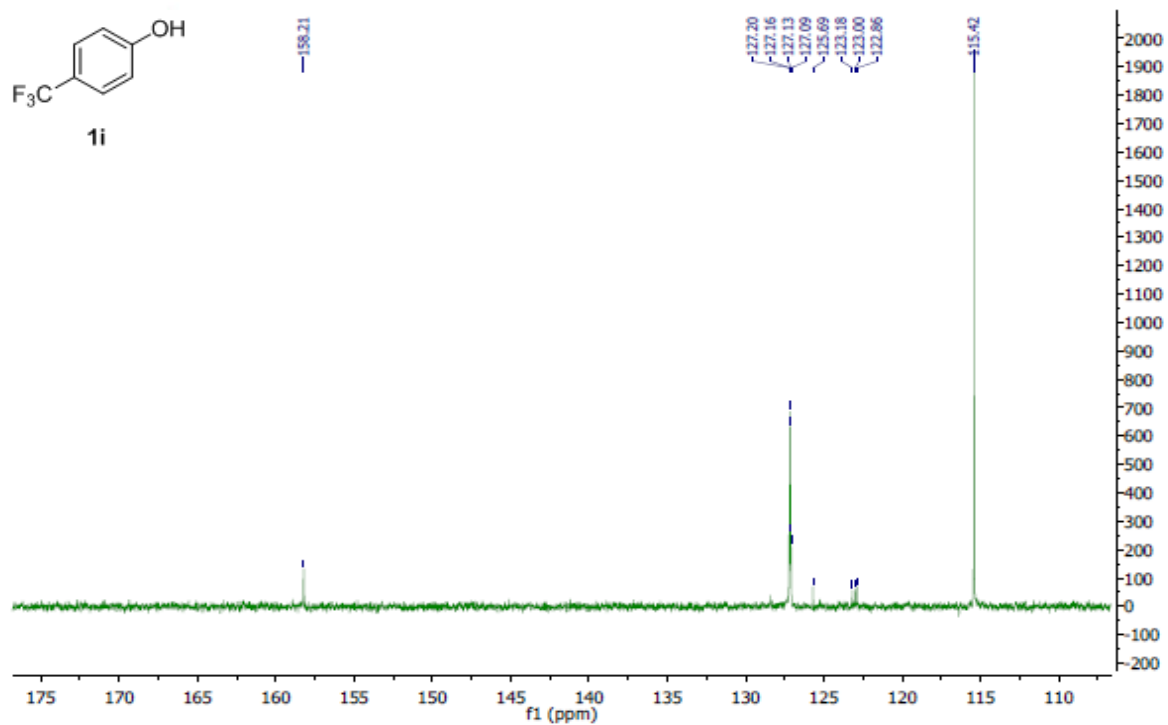

Spectra RMN- $^{13}\text{C}$  ( $\text{CDCl}_3$ , 100 MHz) de *p*-Trifluoromethylphenol **1i**

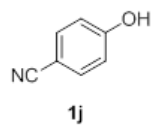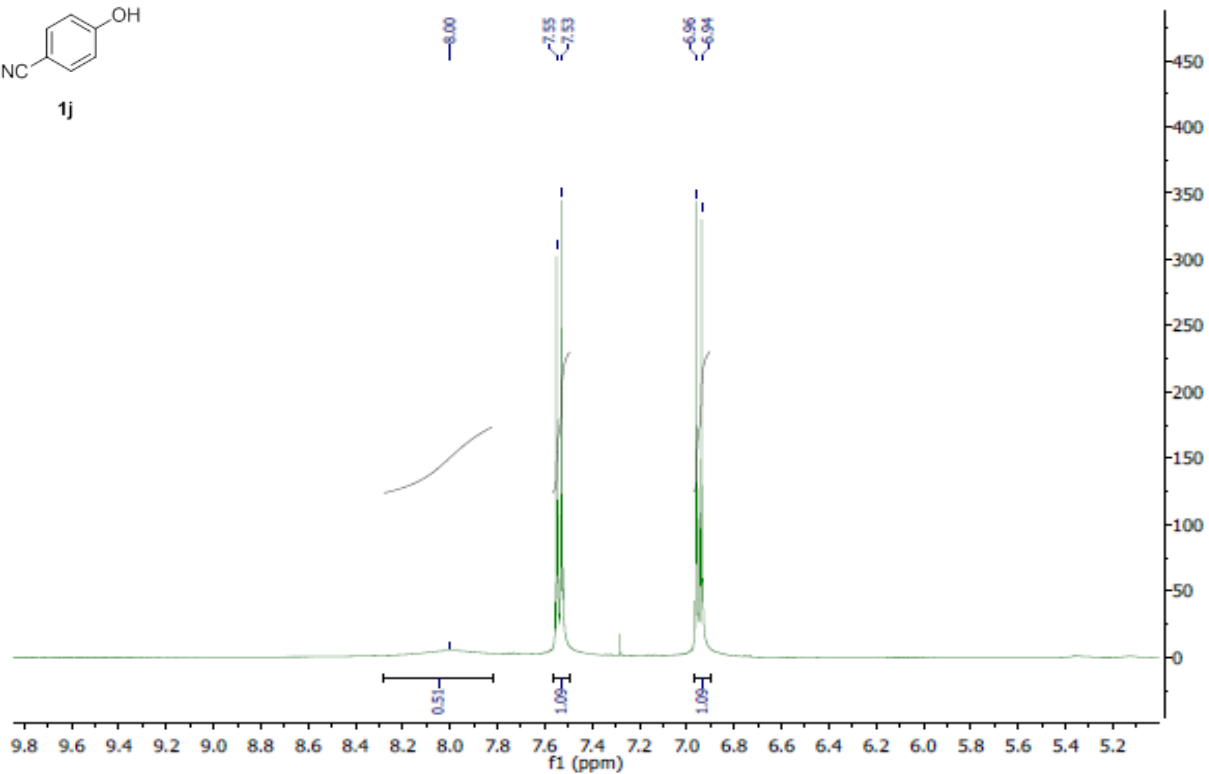

Spectra RMN-<sup>1</sup>H (CDCl<sub>3</sub>, 400 MHz) of *p*- Hydroxybenzonnitrile **1j**

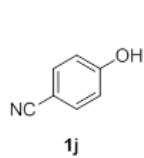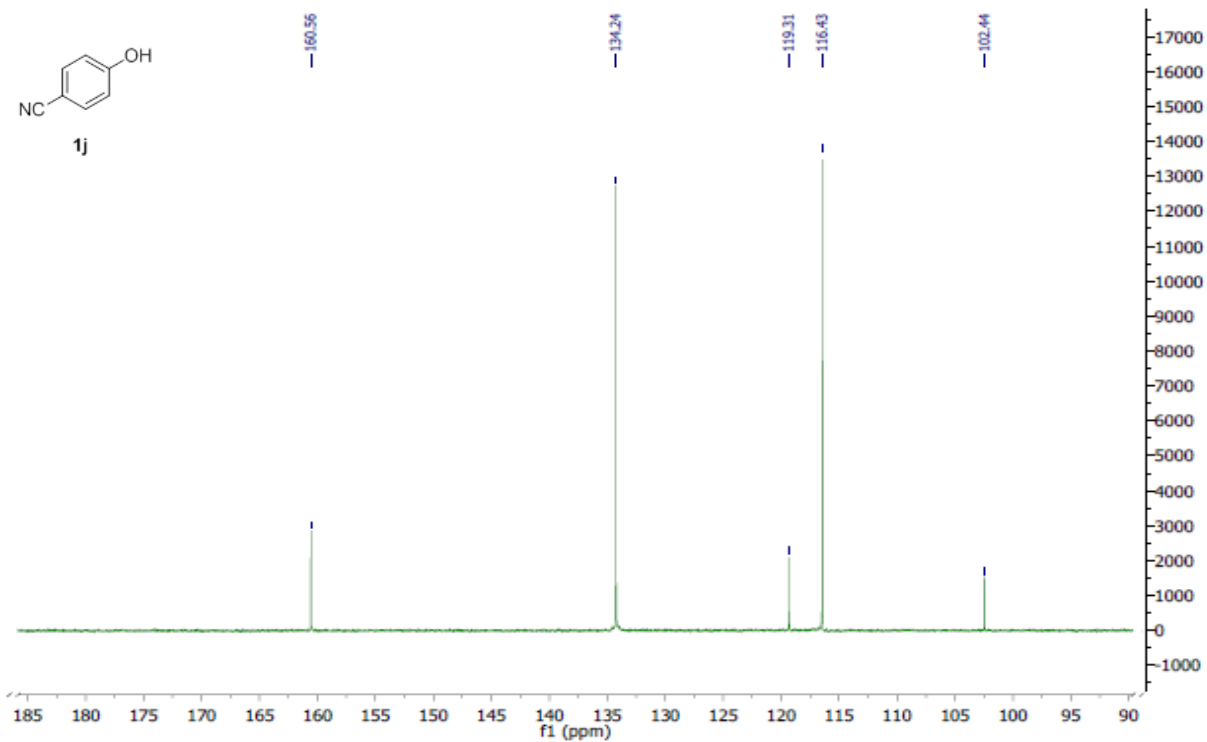

Spectra RMN-<sup>13</sup>C(CDCl<sub>3</sub>, 100 MHz) de *p*- Hydroxybenzonnitrile **1j**

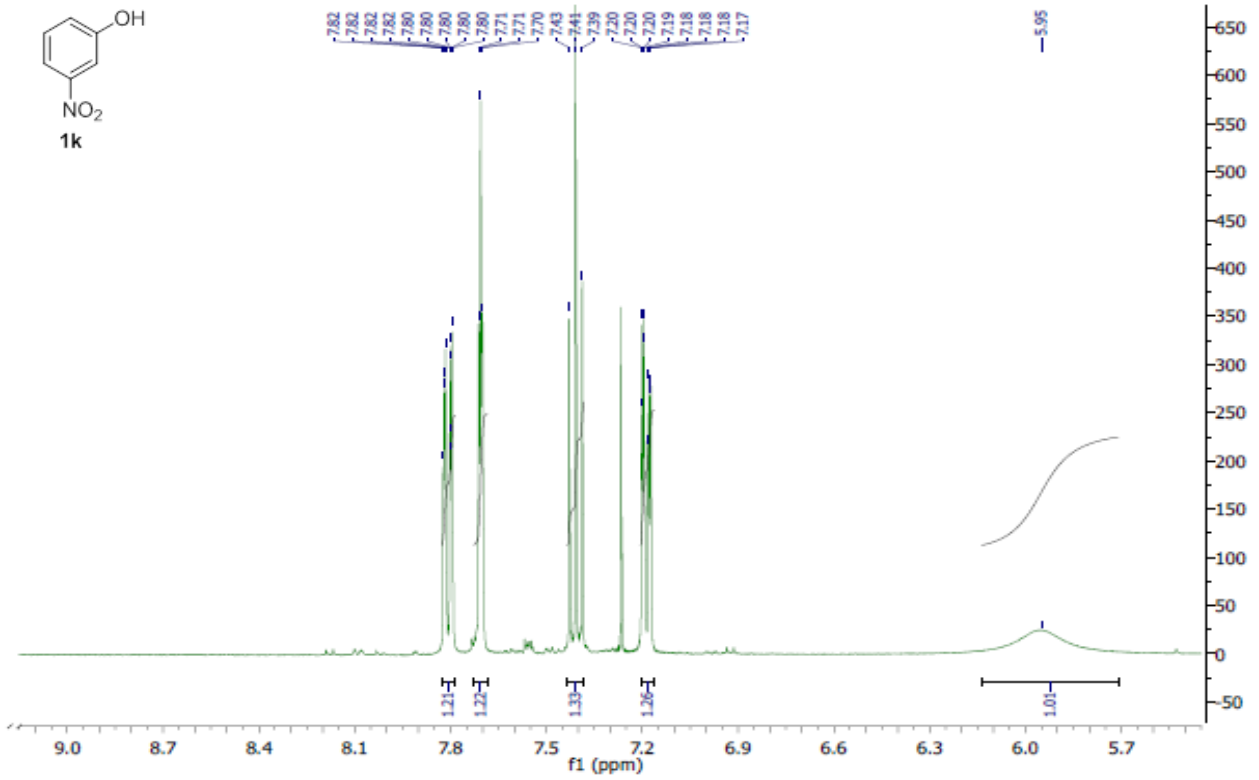

Spectra RMN-<sup>1</sup>H (CDCl<sub>3</sub>, 400 MHz) of *m*-Nitrophenol **1k**

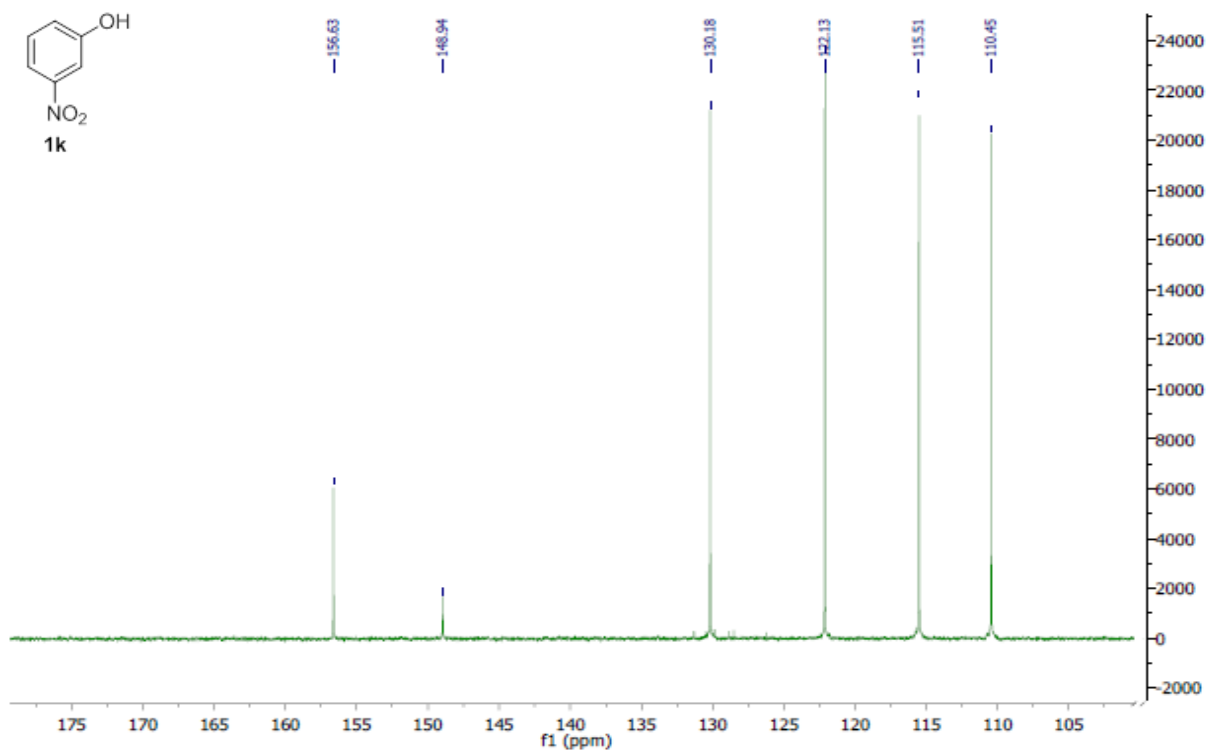

Spectra RMN-<sup>13</sup>C(CDCl<sub>3</sub>, 100MHz) of *m*-Nitrophenol **1k**
